# Supplementary material
Source: publisher figshare collection journal article supplement (https://karger.figshare.com/ndownloader/files/30792304)
Supplement: Supplementary file 1 [file 30792304]

**Supplementary Fig. 1** – Differences in the communication between Gastroenterology department and patients.
